# Supplementary material
Source: PubMed Central journal article supplement (PMC4355090)

**A**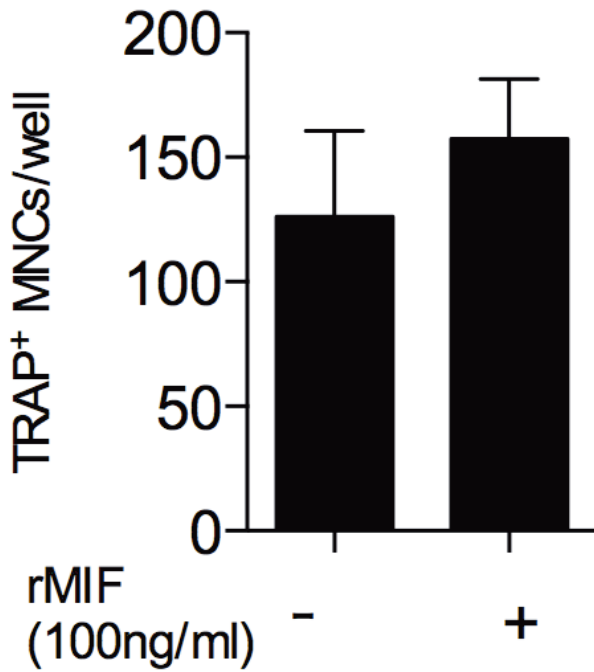**B**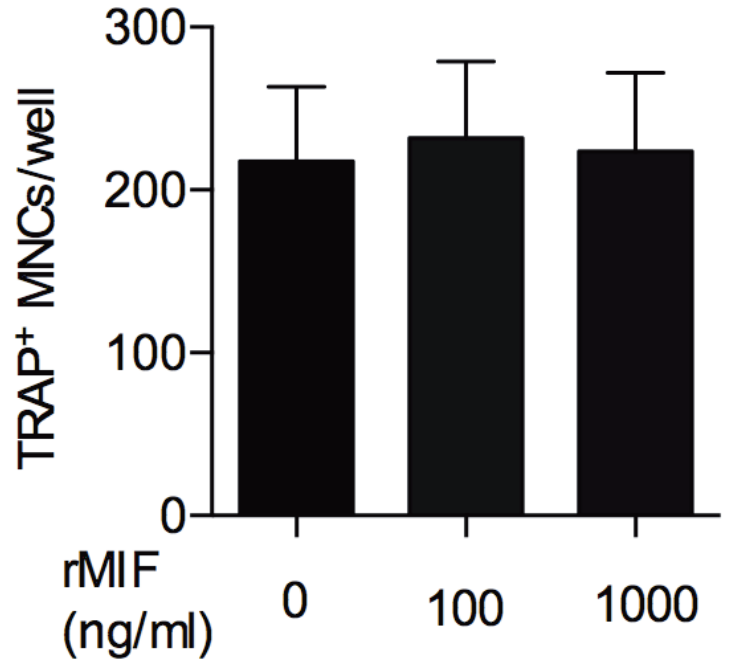**C**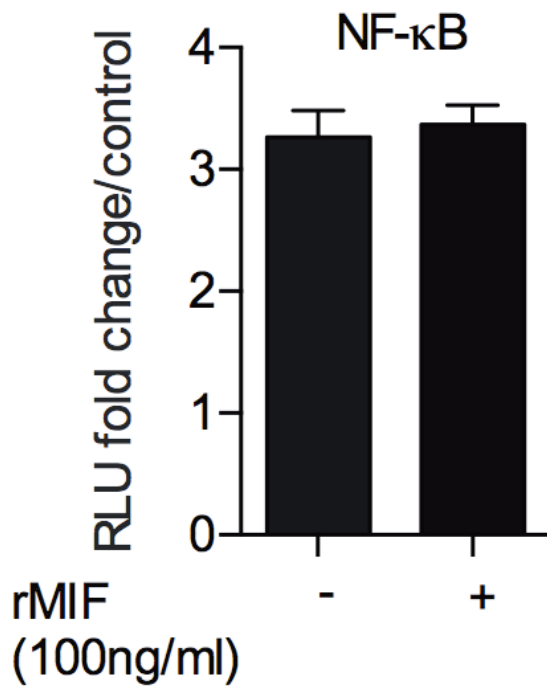**D**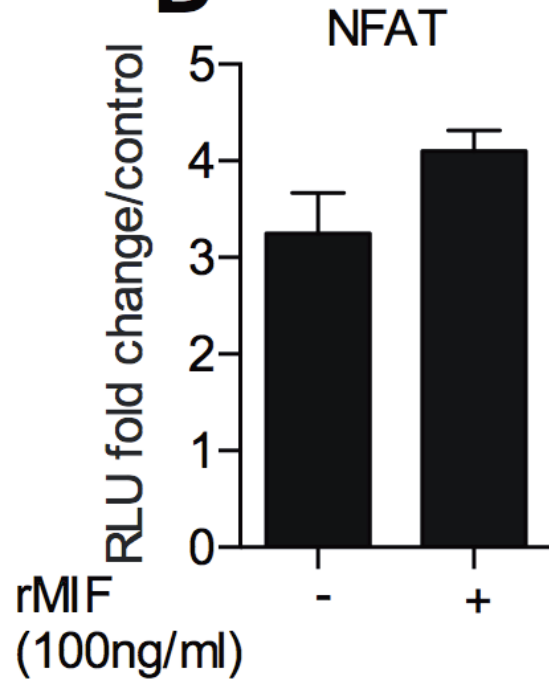

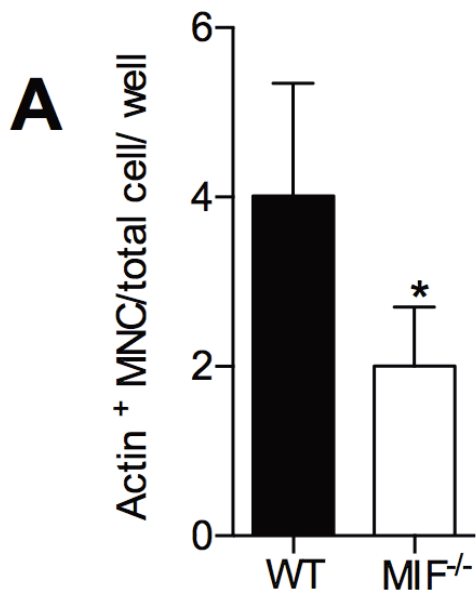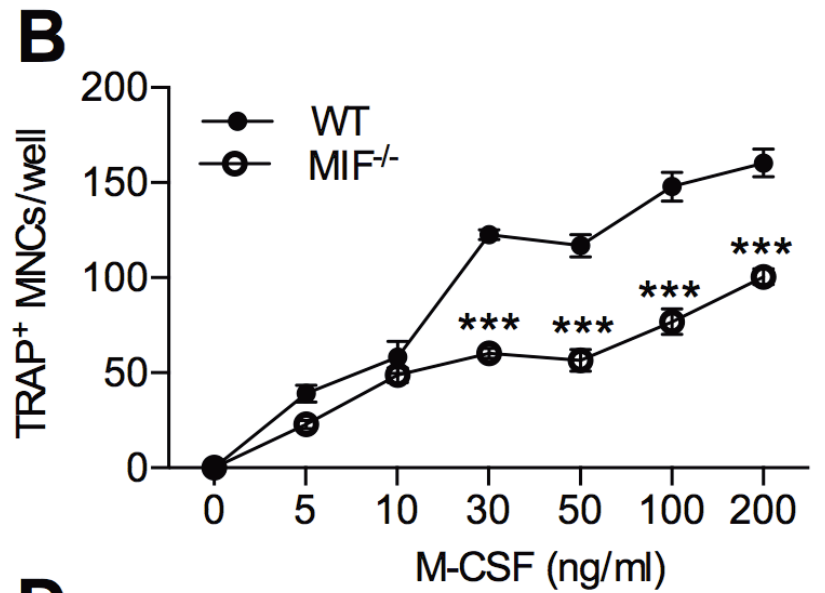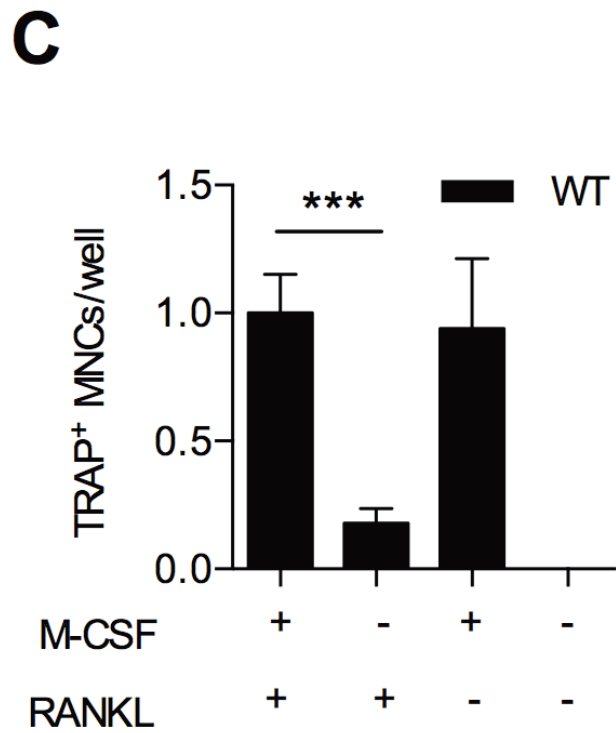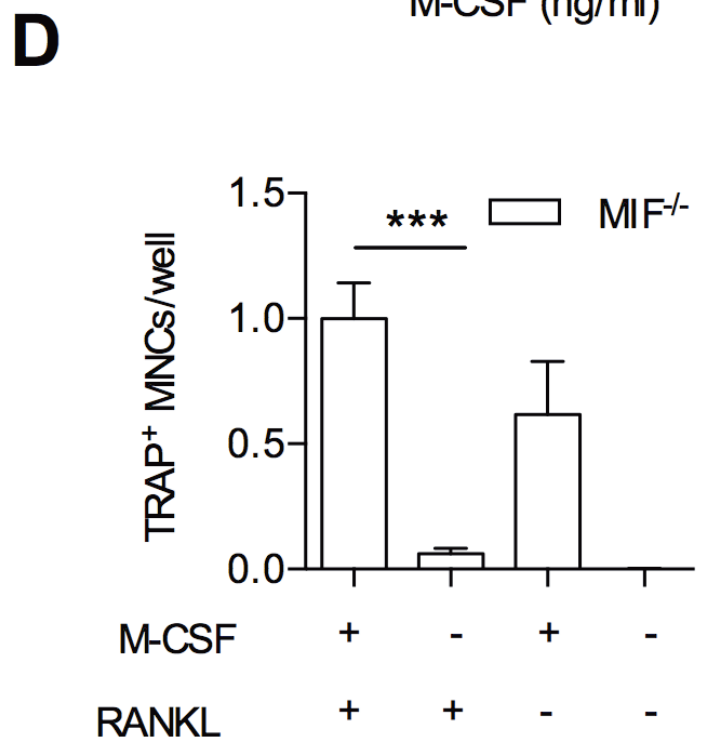

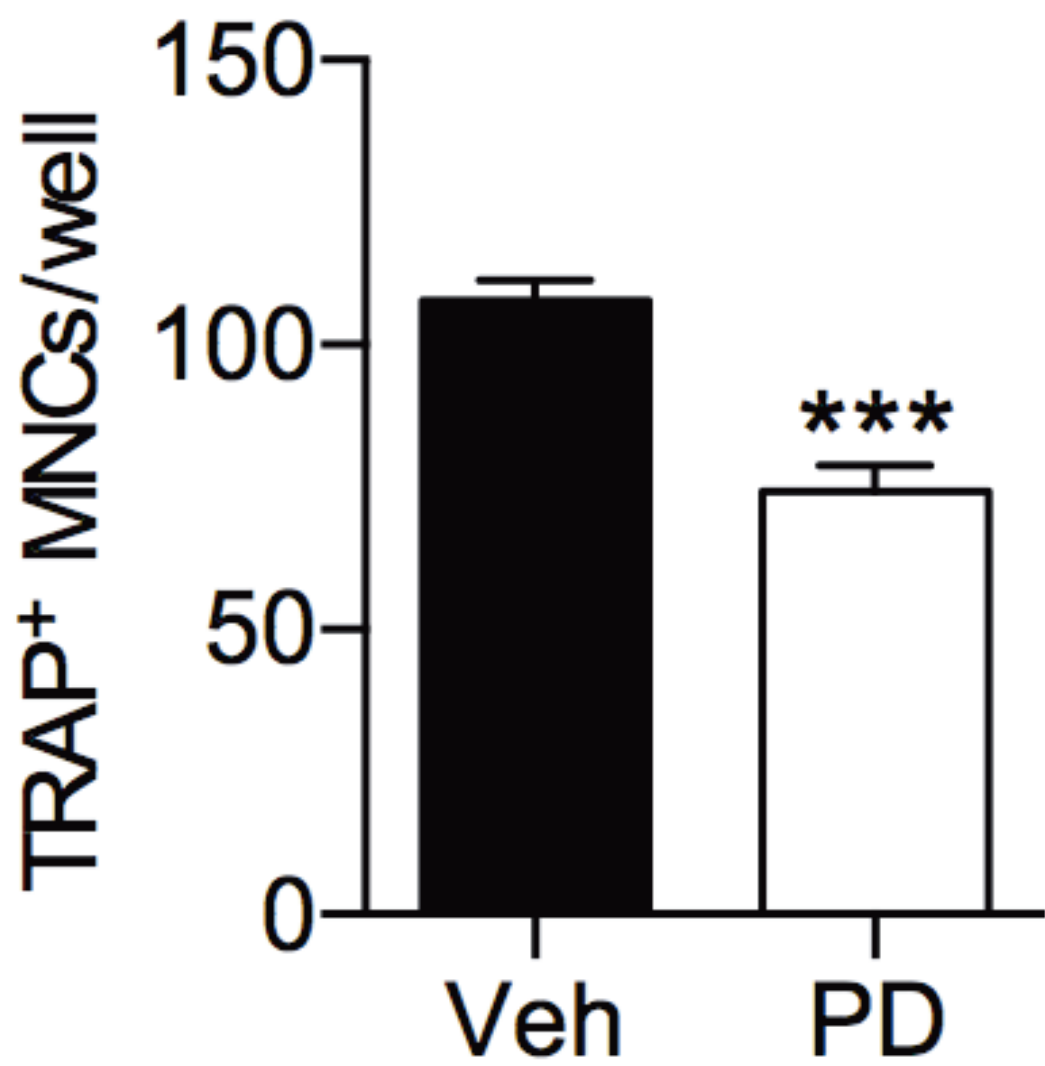

Supplement: NIHMS662544-supplement-Figures.pdf [file NIHMS662544-supplement-Figures.pdf]
